# Supplementary material
Source: PubMed Central journal article supplement (PMC6513674)
Supplement: NIHMS1022476-supplement-Supplementary_Material.pdf [file NIHMS1022476-supplement-Supplementary_Material.pdf]

A

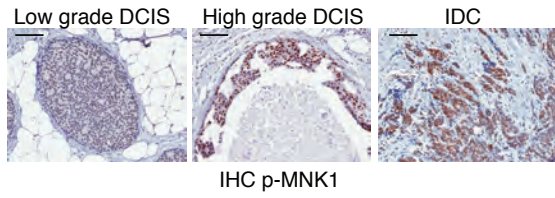

B

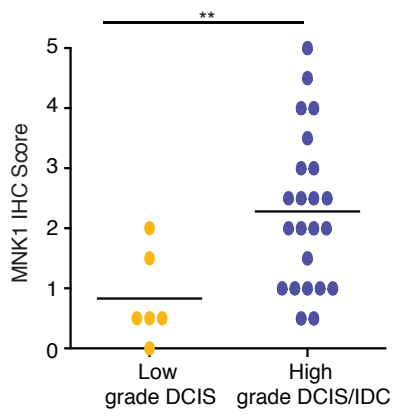

C

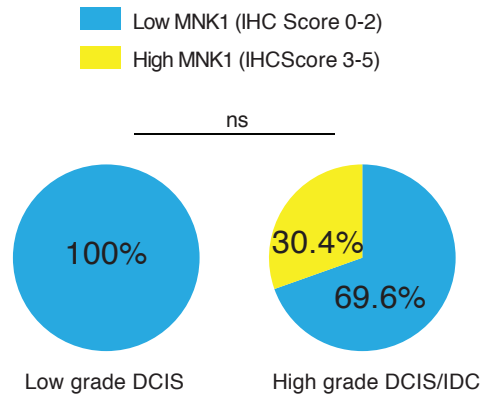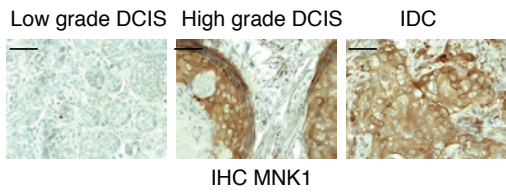

**Supplementary Figure 1. Increased MNK1 activity in IDC.** **A.** Zoomed in images from Fig.1A to show that phospho-MNK1 levels are higher in high grade DCIS and IDC than low grade DCIS. Scale bar = 100  $\mu\text{m}$ . **B.** MNK1 levels are higher in high grade DCIS/IDC samples than low grade DCIS samples. Scale bar = 200  $\mu\text{m}$ . **C.** Increased percentage of samples with high MNK1 staining in high grade DCIS/IDC compared to low grade DCIS.

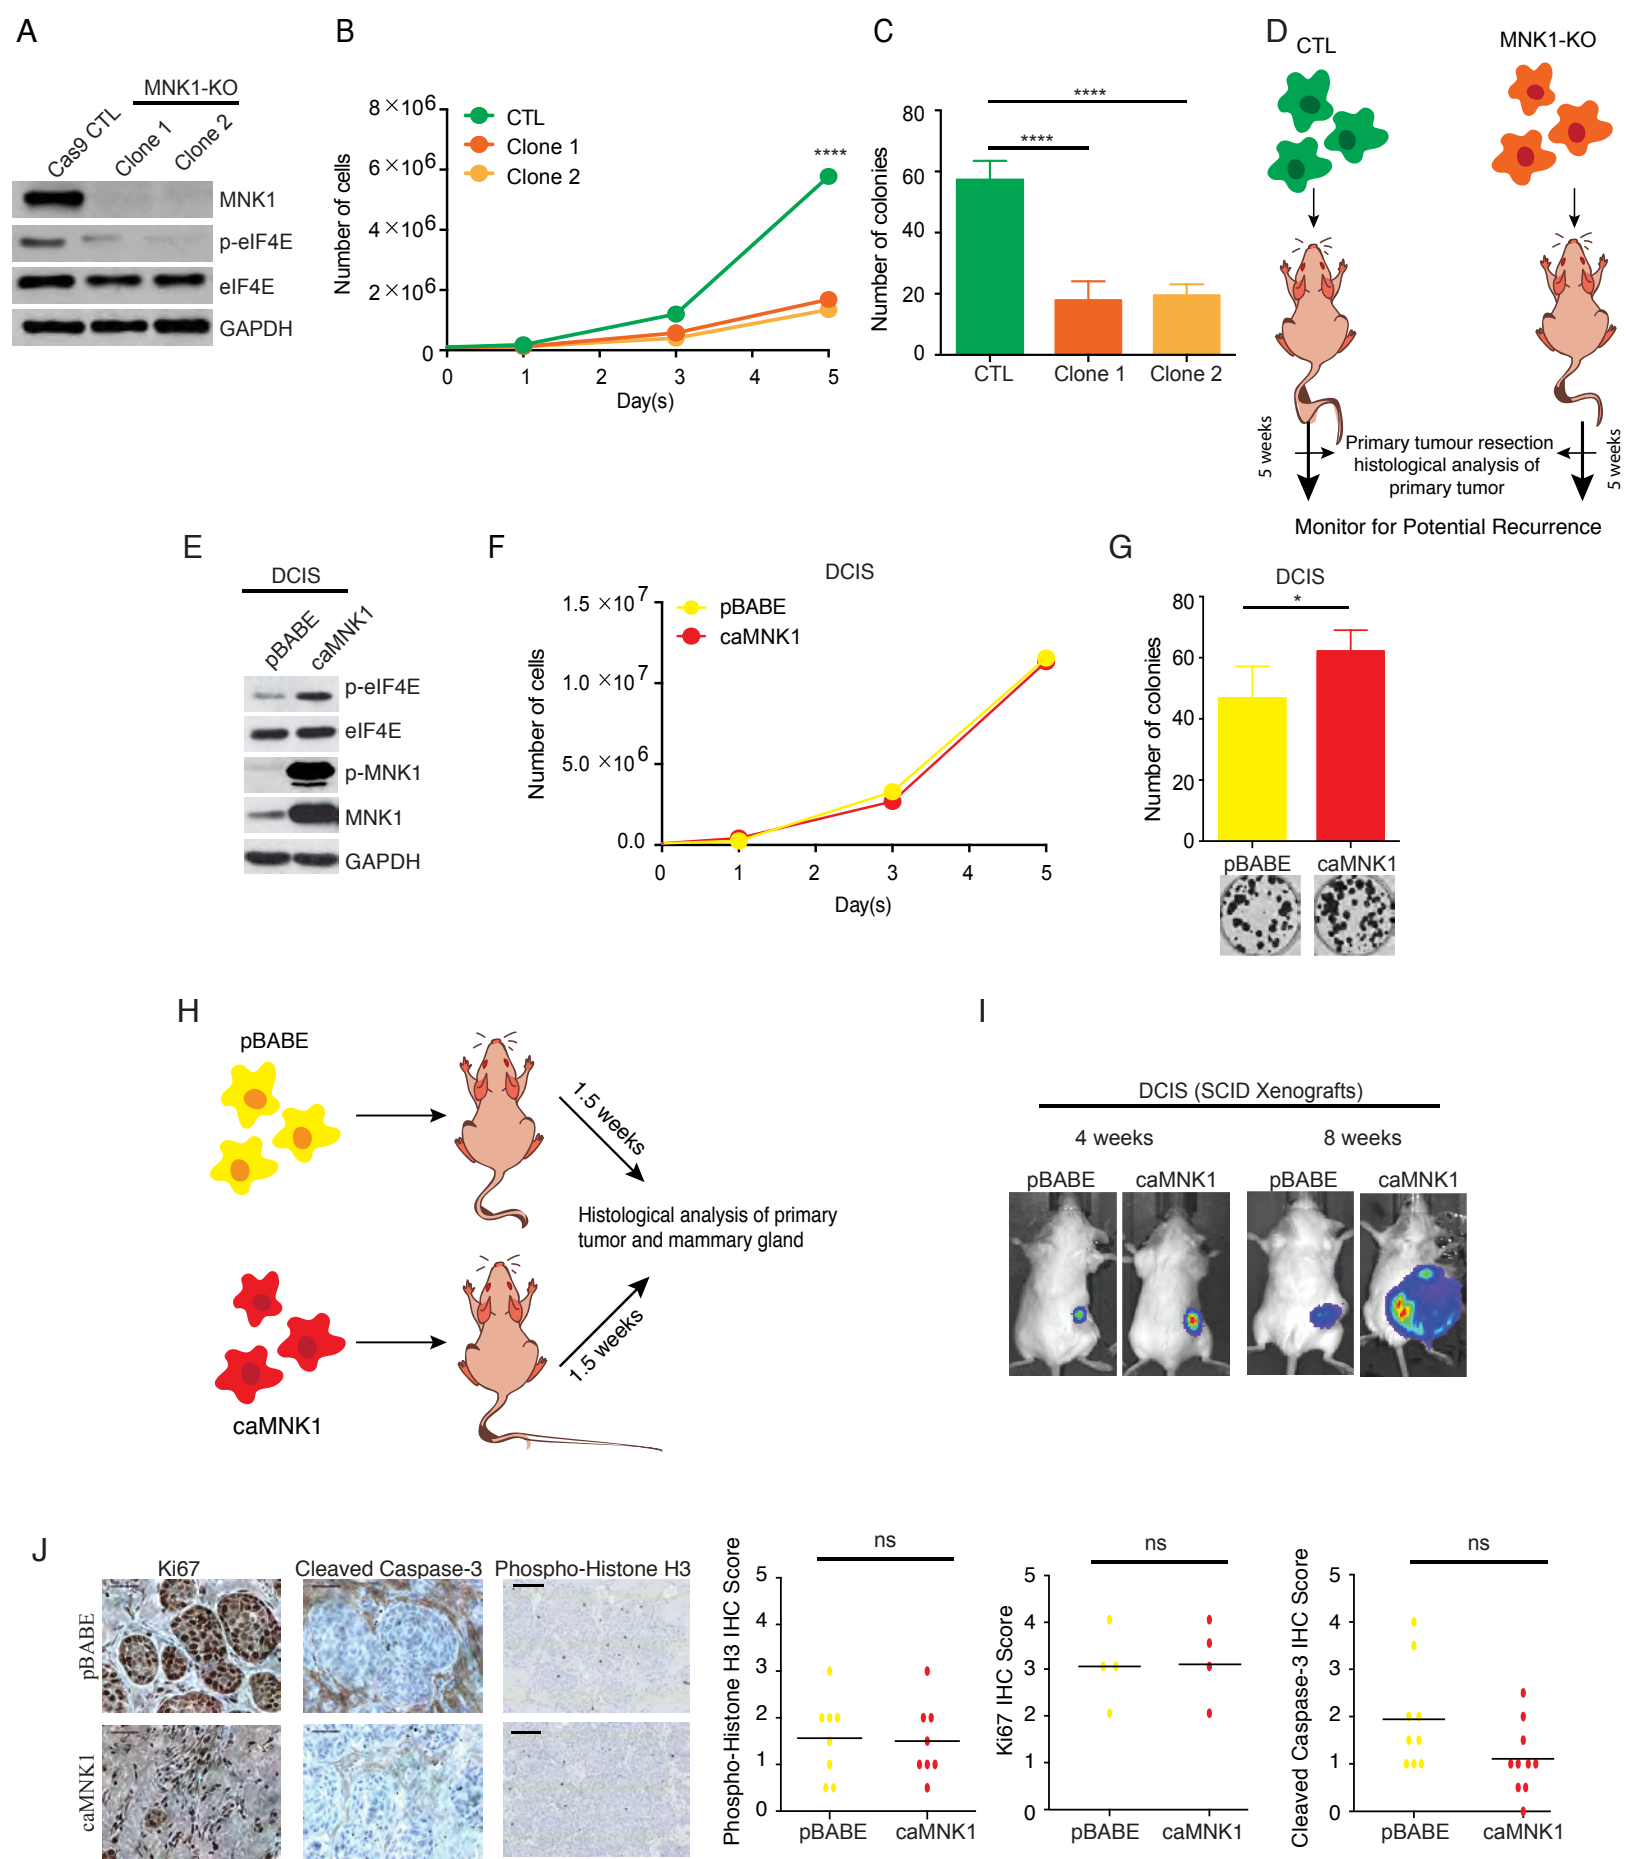

**Supplementary Figure 2. Modulation of MNK1 affects colony formation in 2D cell culture.**

**A.** MNK1 knock-out by CRISPR-Cas 9 technology in 2 independent clones is confirmed by WB. **B.** MNK1-KO inhibits cell proliferation. **C.** MNK1-KO inhibits colony formation. **D.** Schematic depicting timing and measured outcomes in CTL and MNK1-KO xenografts. **E.** caMNK1 overexpression is confirmed by WB. **F.** caMNK1 overexpression does not affect DCIS proliferation. **G.** caMNK1 overexpression increases DCIS colony formation. **H.** Schematic depicting timing and measured outcomes in pBABE and caMNK1 xenografts. **I.** IVIS imaging of pBABE and caMNK1 xenografts in SCID mice. **J.** pBABE and caMNK1 xenografts express similar levels of Ki67 and phospho-histone H3. Cleaved caspase-3 levels in caMNK1 xenografts trended downward compared to pBABE.

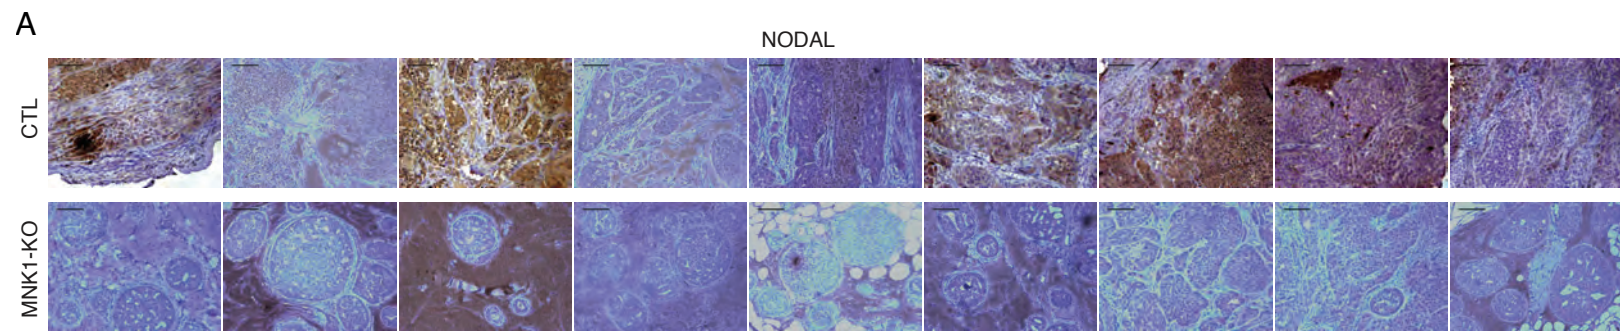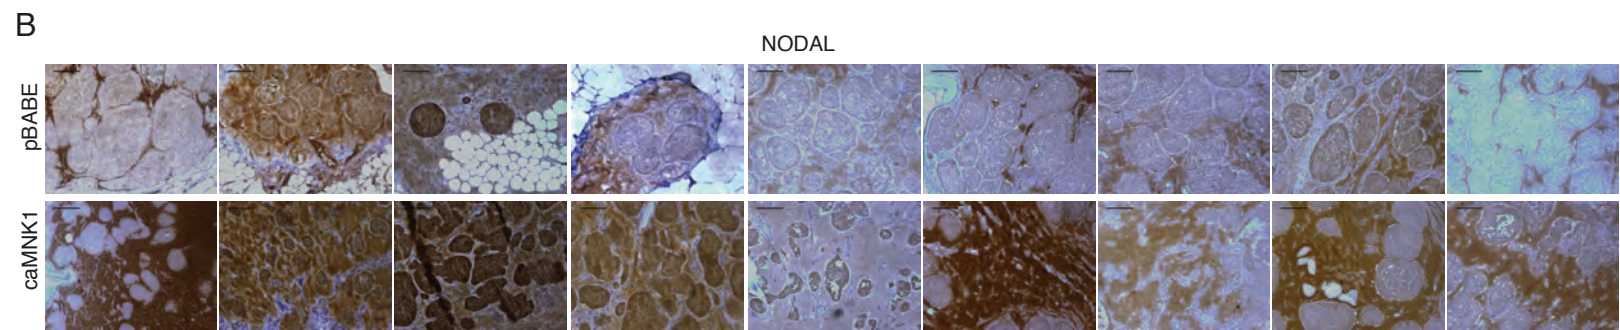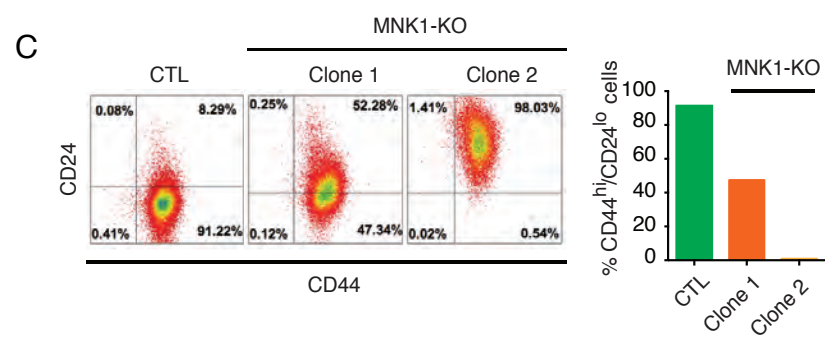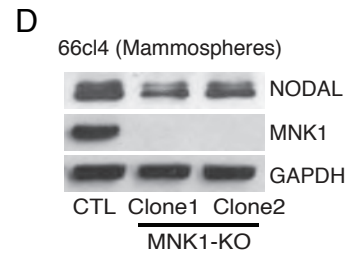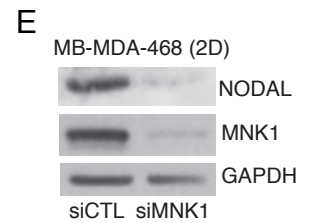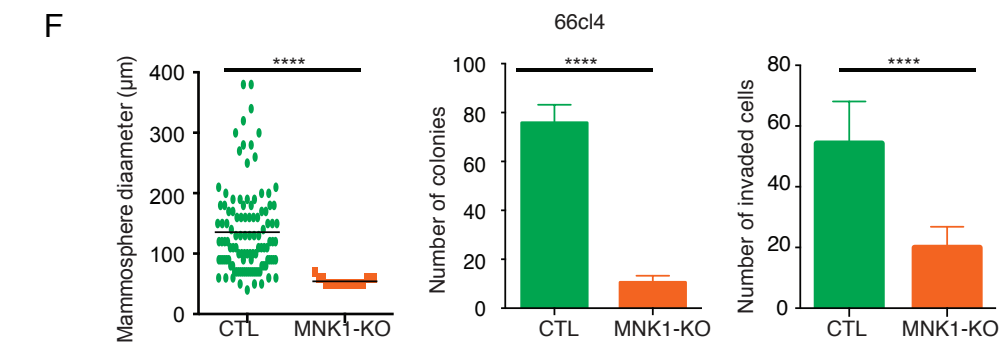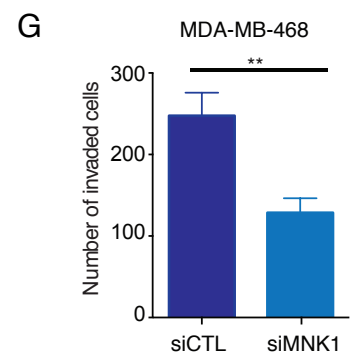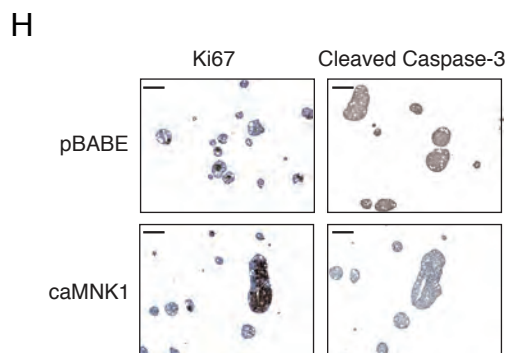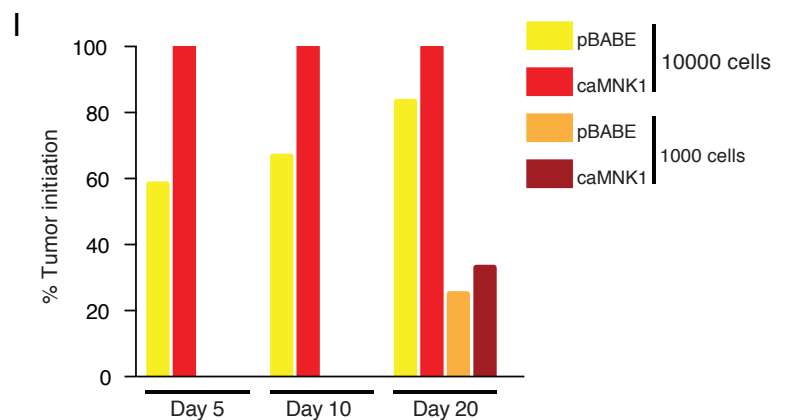

**Supplementary Figure 3. NODAL levels are regulated by MNK1.** **A.** MNK1-KO xenografts have decreased NODAL levels compared to CTL tumors. Representative images from 18 tumors are shown. Scale bar = 200  $\mu$ m. **B.** caMNK1 xenografts have increased NODAL levels compared to pBABE tumors. Representative images from 18 tumors are shown. Scale bar = 200  $\mu$ m. **C.** Loss of MNK1 causes decrease of CD44<sup>hi</sup>/CD24<sup>lo</sup> cells in the DCIS population to decrease. **D.** 66cl4 MNK1-KO mammospheres have decreased NODAL levels compared to CTL mammospheres. **E.** MNK1 knock-down by siRNA decreases NODAL levels and cell invasion in MB-MDA-468 cells. **F.** 66cl4 MNK1-KO cells form mammospheres with smaller diameters, showed impaired colony formation ability and decreased invasion compared to CTL mammospheres. **G.** MNK1 knock-down by siRNA decreases MB-MDA-468 invasion. **H.** caMNK1 expressing DCIS mammospheres express decreased cleaved caspase 3 but similar Ki67 levels compared to pBABE mammospheres. **I.** Tumor initiation rate of DCIS-Luc pBABE and caMNK1 *in vivo* limiting dilution experiment.

**A**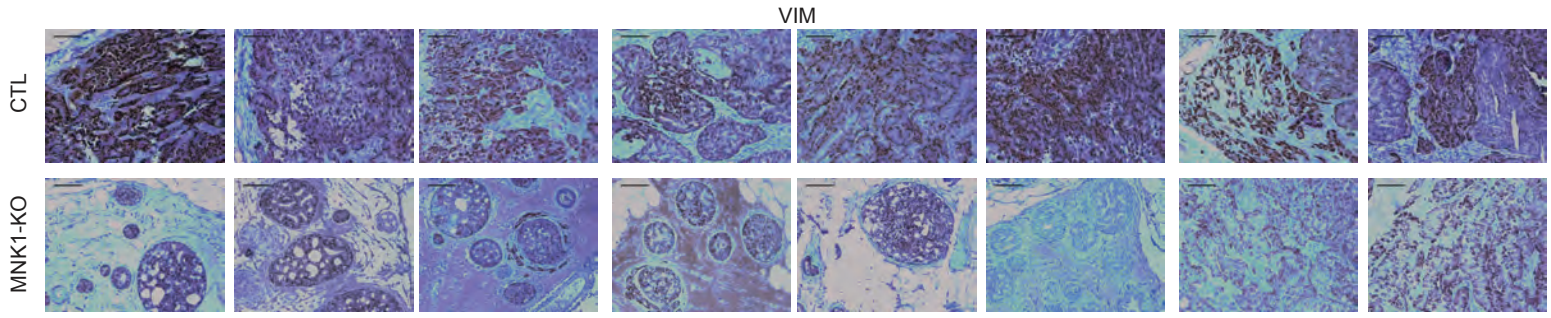**B**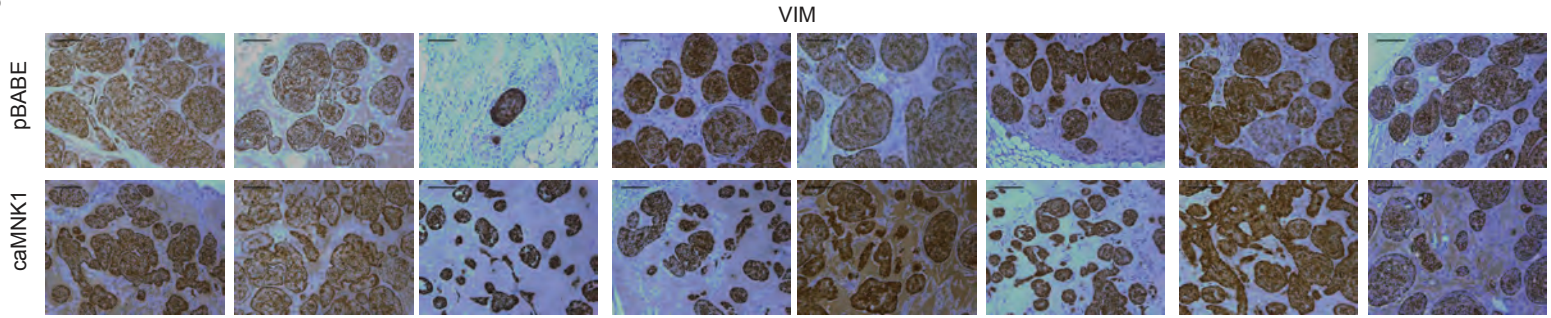

**Supplementary Figure 4. VIMENTIN levels are regulated by MNK1.** **A.** MNK-KO xenografts have decreased VIMENTIN (VIM) levels compared to CTL tumors. Representative images from 16 tumors are shown. Scale bar = 200  $\mu\text{m}$ . **B.** caMNK1 xenografts have increased VIMENTIN (VIM) levels compared to pBABE control tumors. Representative images from 16 tumors are shown. Scale bar = 200  $\mu\text{m}$ .



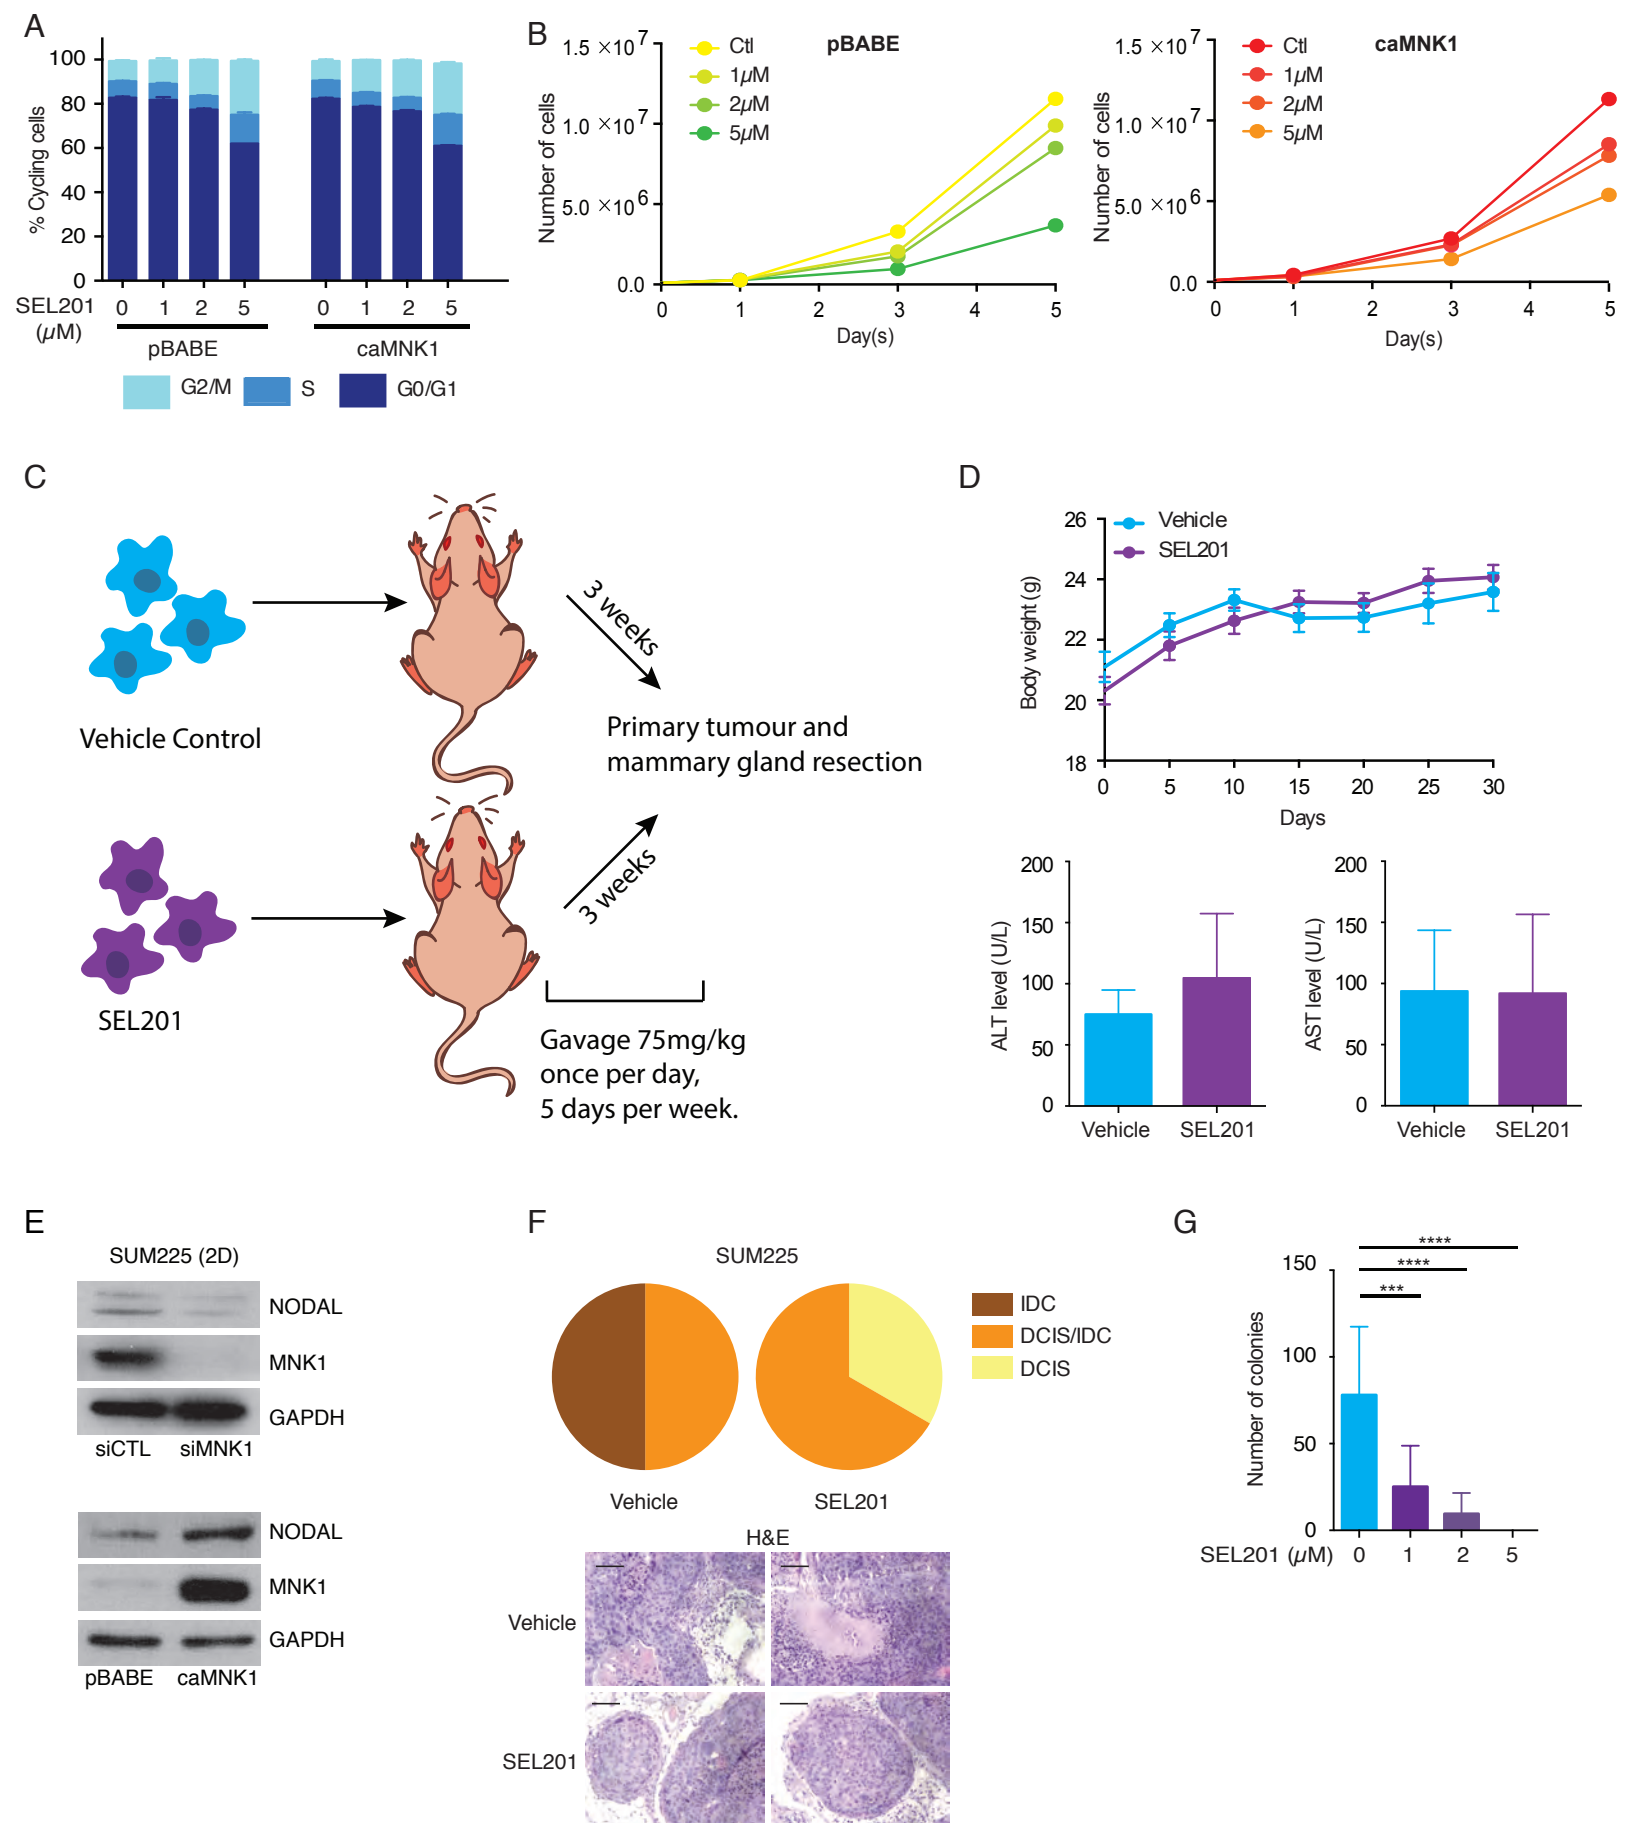

**Supplementary Figure 5. A small molecule inhibitor of MNK1 inhibits the DCIS-IDC transition.** **A.** SEL201 induces a G2/M arrest in pBABE and caMNK1 cells in a dose dependent manner. **B.** SEL201 inhibits pBABE and caMNK1 cell proliferation in a dose-dependent manner. **C.** Schematic depicting the timing and measured outcomes of SEL201 xenograft experiment. **D.** SEL201 has no effect on mouse body weight (upper panel), or on liver toxicity, as assessed by ALT and AST (lower panels) levels. **E.** MNK1 knock-down by siRNA decreases NODAL levels in SUM225 cells (upper panel). caMNK1 expressing SUM225 cells express increased NODAL levels compared to pBABE controls (lower panel). **F.** SUM225 primary tumor outgrowth over 9 weeks in vehicle versus SEL201-treated animals. MNK inhibitor SEL201 treatment slows down DCIS to IDC progression in NOD/SCID mice. **G.** SEL201 inhibits SUM225 colony formation.

**Table S1. Antibodies**

| Target protein           | Antibody                             | Usage    |
|--------------------------|--------------------------------------|----------|
| eIF4E                    | #610269 BD Transduction Laboratories | WB       |
| GAPDH                    | #2118S Cell Signaling                | WB       |
| MNK1                     | #2195S Cell Signaling                | WB & IHC |
| NODAL                    | Ab55676 Abcam                        | WB & IHC |
| p63                      | Ab735 Abcam                          | IHC      |
| phospho-eIF4E            | #9741S Cell Signaling                | WB       |
| phospho-Histone H3 Ser10 | #09-797 EMD Millipore                | IHC      |
| phospho-MNK1             | #2111S Cell Signaling                | WB & IHC |
| VIMENTIN                 | #550513 BD Pharmingen                | WB & IHC |

**Table S2. Statistical analysis**

| <b>Figure</b> | <b>Number of Samples</b>                               | <b>Statistical Analysis</b>     | <b>P Value</b>                                                                                                                                            |
|---------------|--------------------------------------------------------|---------------------------------|-----------------------------------------------------------------------------------------------------------------------------------------------------------|
| <b>1A</b>     | Low grade DCIS n=13<br>High grade DCIS and IDC<br>n=27 | Wilcoxon-Mann-Whitney test      | p=0.0036                                                                                                                                                  |
| <b>1B</b>     | Low grade DCIS n=13<br>High grade DCIS and IDC<br>n=27 | Chi-square test of independence | p=0.0132                                                                                                                                                  |
| <b>2A</b>     | CTL n=10<br>MNK1-KO n=16<br>(2 tumors on each animal)  | Two-way ANOVA                   | CTL vs MNK1-KO tumor growth<br>Week 0 - p>0.9999<br>Week 1 - p=0.9998<br>Week 2 - p=0.8747<br>Week 3 - p=0.0042<br>Week 4 - p<0.0001<br>Week 5 - p<0.0001 |
| <b>2C</b>     | CTL n=10<br>MNK1-KO n=10<br>(2 tumors on each animal)  | Chi-square test of independence | CTL vs MNK1-KO<br>%IDC - p=0.0001                                                                                                                         |
| <b>2D</b>     | CTL n=10<br>MNK1-KO n=10<br>(2 tumors on each animal)  | Chi-square test of independence | CTL vs MNK1-KO<br>%Necrosis - p=0.0001                                                                                                                    |
| <b>2E</b>     | CTL n=5<br>MNK1-KO n=5                                 | Log-rank test                   | p=0.1268                                                                                                                                                  |
| <b>2H</b>     | (Nude Mice)<br>pBABE n=10<br>caMNK1 n=10               | T test (do not assume same SD)  | p=0.0002                                                                                                                                                  |
| <b>2J</b>     | (Nude Mice)<br>pBABE n=10<br>caMNK1 n=10               | Chi-square test of independence | %Necrosis - p<0.0001<br>%Micrometastasis - p=0.0339                                                                                                       |
| <b>2K</b>     | (SCID Mice)<br>pBABE n=10<br>caMNK1 n=10               | Two-way ANOVA                   | pBABE vs caMNK1<br>Week 1-Week 5 - p>0.9999<br>Week 6 - p=0.9998<br>Week 7 - p=0.0161<br>Week 8 - p<0.0001                                                |
| <b>3A</b>     | Human Sample<br>DCIS n=17<br>IDC n=12                  | Wilcoxon-Mann-Whitney test      | p=0.0001                                                                                                                                                  |
| <b>3B</b>     | (Nude Mice)<br>CTL n=10<br>MNK1-KO n=10                | Wilcoxon-Mann-Whitney test      | p=0.0107                                                                                                                                                  |
| <b>3C</b>     | (Nude Mice)<br>pBABE n=10<br>caMNK1 n=10               | Wilcoxon-Mann-Whitney test      | p=0.0163                                                                                                                                                  |

| Figure    | Number of Samples                                                                                                                                                                                                     | Statistical Analysis            | P Value                                                                                                                   |
|-----------|-----------------------------------------------------------------------------------------------------------------------------------------------------------------------------------------------------------------------|---------------------------------|---------------------------------------------------------------------------------------------------------------------------|
| <b>3D</b> | 4 independent experiments<br>Number of mammospheres quantified:<br>CTL=176<br>MNK1-KO=78<br>(spheres<0.05mm <sup>2</sup> are excluded from quantification)                                                            | T test (do not assume equal SD) | p<0.0001                                                                                                                  |
| <b>3E</b> | 3 independent experiments<br>9 data points for both groups                                                                                                                                                            | T test (do not assume equal SD) | p=0.0401                                                                                                                  |
| <b>3F</b> | 3 independent experiments<br>9 data points for both groups                                                                                                                                                            | T test (do not assume equal SD) | p=0.0059                                                                                                                  |
| <b>3G</b> | 3 independent experiments<br>Number of mammospheres quantified:<br>CTL Vehicle=169<br>CTL rhNODAL=317<br>MNK1-KO Vehicle=204<br>MNK1-KO rhNODAL=227<br>(spheres<0.05mm <sup>2</sup> are excluded from quantification) | One-way ANOVA                   | CTL Vehicle vs rhNODAL - p<0.0001<br>MNK1-KO Vehicle vs rhNODAL -p<0.0001<br>CTL Vehicle vs MNK1-KO Vehicle-p<0.0001      |
| <b>3H</b> | 4 independent experiments                                                                                                                                                                                             | T test (do not assume equal SD) | p<0.0001                                                                                                                  |
| <b>3I</b> | 3 independent experiments                                                                                                                                                                                             | T test (do not assume equal SD) | p=0.0003                                                                                                                  |
| <b>3J</b> | 3 independent experiments                                                                                                                                                                                             | One-way ANOVA                   | pBABE Vehicle vs SB436542 - p=0.0029<br>caMNK1 Vehicle vs SB436542 - p=0.0012<br>pBABE Vehicle vs caMNK1 Vehicle - 0.0011 |
| <b>4A</b> | (Nude Mice)<br>CTL=10<br>MNK1-KO=10                                                                                                                                                                                   | Wilcoxon-Mann-Whitney test      | p=0.0035                                                                                                                  |
| <b>4B</b> | (Nude Mice)<br>pBABE n=10<br>caMNK1 n=10                                                                                                                                                                              | Wilcoxon-Mann-Whitney test      | p=0.0094                                                                                                                  |
| <b>4C</b> | 3 independent experiments<br>9 data points quantified for both groups                                                                                                                                                 | T test (do not assume equal SD) | p=0.0034                                                                                                                  |
| <b>4D</b> | 3 independent experiments<br>9 data points quantified for both groups                                                                                                                                                 | T test (do not assume equal SD) | p=0.0450                                                                                                                  |

| Figure | Number of Samples                                                                                                                                                        | Statistical Analysis               | P Value                                                                                                                                                                                              |
|--------|--------------------------------------------------------------------------------------------------------------------------------------------------------------------------|------------------------------------|------------------------------------------------------------------------------------------------------------------------------------------------------------------------------------------------------|
| 4E     | 3 independent experiments<br>9 data points quantified for all groups                                                                                                     | One-way ANOVA                      | pBABE siCTL vs siVIM-1 - p<0.0001<br>pBABE siCTL vs VIM-2 - p<0.0001<br>caMNK1 siCTL vs VIM-1 - p<0.0001<br>caMNK1 siCTL vs VIM-2 - p<0.0001<br>pBABE siCTL vs caMNK1 siCTL - p=0.0006               |
| 4F     | 3 independent experiments<br>9 data points quantified for all the groups                                                                                                 | One-way ANOVA                      | CTL Vehicle vs rhNODAL - p=0.0102<br>MNK1-KO Vehicle vs rhNODAL - p=0.0013<br>CTL Vehicle vs MNK1-KO Vehicle- p<0.0001                                                                               |
| 4G     | 3 independent experiments<br>Data points:<br>pBABE siCTL=19<br>pBABE siNODAL-1=21<br>pBABE siNODAL-2=21<br>caMNK1 siCTL=20<br>caMNK1 siNODAL-1=20<br>caMNK1 siNODAL-2=16 | One-way ANOVA                      | pBABE siCTL vs siNODAL-1 - p<0.0001<br>pBABE siCTL vs siNODAL-2 - p<0.0001<br>caMNK1 siCTL vs siNODAL-1 - p<0.0001<br>caMNK1 siCTL vs siNODAL-2 - p<0.0001<br>pBABE siCTL vs caMNK1 siCTL - p<0.0001 |
| 5A     | 4 independent experiments                                                                                                                                                | One-way ANOVA                      | pBABE 0 vs 1 - p>0.9999<br>pBABE 0 vs 2 - p=0.0348<br>pBABE 0 vs 5 - p<0.0001<br>pBABE 0 vs caMNK1 0 - p=0.0770<br>caMNK1 0 vs 1 - p=0.0159<br>caMNK1 0 vs 2 - p=0.0011<br>caMNK1 0 vs 5 - p<0.0001  |
| 5B     | 3 independent experiments                                                                                                                                                | One-way ANOVA                      | pBABE Vehicle vs SEL201 - p=0.2666<br>caMNK1 Vehicle vs SEL201 - p=0.0005<br>pBABE Vehicle vs caMNK1 Vehicle - p=0.0004                                                                              |
| 5C     | 3 independent experiments                                                                                                                                                | One-way ANOVA                      | pBABE Vehicle vs SEL201 - p=0.2005<br>caMNK1 Vehicle vs SEL201 - p<0.0001<br>pBABE Vehicle vs caMNK1 Vehicle - p<0.001                                                                               |
| 5D     | 3 independent experiments                                                                                                                                                | One-way ANOVA                      | pBABE Vehicle vs SEL201 - p=0.0031<br>caMNK1 Vehicle vs SEL201 - p=0.0024<br>pBABE Vehicle vs caMNK1 Vehicle - p<0.0001                                                                              |
| 5E     | Vehicle n=12<br>SEL201 n=12<br>(2 tumors on each animal)                                                                                                                 | Two-way ANOVA                      | Vehicle vs SEL201<br>Week 0 - p>0.9999<br>Week 1 - p=0.9995<br>Week 2 - p=0.0293<br>Week 3 - p=0.0412                                                                                                |
| 5F     | Vehicle n=12<br>SEL201 n=12<br>(2 tumors on each animal)                                                                                                                 | Chi-square test of independence    | % IDC - p<0.0001<br>%Necrosis - p=0.0002                                                                                                                                                             |
| S1B    | Low grade DCIS n=6<br>High grade DCIS and IDC n=23                                                                                                                       | T test<br>(do not assume equal SD) | p=0.00059                                                                                                                                                                                            |
| S1C    | Low grade DCIS n=6<br>High grade DCIS and IDC n=23                                                                                                                       | Chi-square test of independence    | p=0.2885                                                                                                                                                                                             |
| S2B    | 3 independent experiments                                                                                                                                                | Two-way ANOVA                      | CTL vs MNK1-KO Clone 1<br>Day 1 - p=0.8609<br>Day 3 - p<0.0001<br>Day 5 - p<0.0001<br>CTL vs MNK1-KO Clone 2<br>Day 1 - p=0.8794                                                                     |

| Figure | Number of Samples                                                                                                     | Statistical Analysis                             | P Value                                                                                              |
|--------|-----------------------------------------------------------------------------------------------------------------------|--------------------------------------------------|------------------------------------------------------------------------------------------------------|
|        |                                                                                                                       |                                                  | Day 3 - p<0.0001<br>Day 5 - p<0.0001                                                                 |
| S2C    | 3 independent experiments                                                                                             | One-way ANOVA                                    | CTL vs MNK1-KO Clone 1 p<0.0001<br>CTL vs MNK1-KO Clone 2 p<0.0001                                   |
| S2F    | 3 independent experiments                                                                                             | Two-way ANOVA                                    | pBABE vs caMNK1<br>p>0.9999 at all time points                                                       |
| S2G    | 3 independent experiments                                                                                             | T test (do not assume equal SD)                  | p=0.0213                                                                                             |
| S2J    | Phospho-Histone H3<br>pBABE=8<br>caMNK1=8<br>Ki67<br>pBABE=4<br>caMNK1=4<br>Cleaved caspase 3<br>pBABE=9<br>caMNK1=10 | Wilcoxon-Mann-Whitney test                       | pBABE vs caMNK1<br>Phospho-Histone H3 - p=0.9977<br>Ki67 - p=0.9714<br>Cleaved caspase-3 - p=0.676   |
| S3F    | 3 independent experiments for all panels                                                                              | T test (do not assume equal SD)                  | 66cl4 CTL vs MNK1-KO:<br>Mammosphere size p<0.0001<br>Colony formation p<0.0001<br>Invasion p<0.0001 |
| S5B    | Vehicle n=6<br>SEL201 n=6<br>(2 tumors on each animal)                                                                | Two-way ANOVA<br>T test (do not assume equal SD) | Vehicle vs SEL201<br>Body weight (Two-way ANOVA) - ns<br>ALT - p=0.2477<br>AST - p=0.9576            |
| S5E    | Vehicle n=4<br>SEL201 n=6                                                                                             | Chi-square test of independence                  | p=0.1084                                                                                             |
| S5G    | 3 independent experiments                                                                                             | One-way ANOVA                                    | SEL201 0 vs 1 μM p=0.0001<br>SEL201 0 vs 2 μM p<0.0001<br>SEL201 0 vs 5 μM p<0.0001                  |

**Table S3. Metastasis data for CTL versus MNK1-KO mice.**

| <b>Group</b>   | <b>Animal ID</b> | <b>Survival Duration (Days)</b> | <b>Reason for Death</b>             | <b>Necropsy/Histology Findings</b>                                                                                                                |
|----------------|------------------|---------------------------------|-------------------------------------|---------------------------------------------------------------------------------------------------------------------------------------------------|
| <b>CTL</b>     | B3231            | 62                              | Metastasis                          | Lung metastasis.<br>Metastasis infiltrating kidney capsule.                                                                                       |
|                | B3232            | 83                              | Metastasis                          | Metastasis found in the abdominal cavity, near the small bowel.                                                                                   |
|                | B3233            | 99                              | Metastasis                          | Metastasis found in the abdominal cavity, near the pancreas.                                                                                      |
|                | B3234            | 97                              | Metastasis                          | Metastasis found near the kidneys.                                                                                                                |
|                | B3235            | 105                             | Metastasis                          | Metastasis found in the lungs, chest cavity, small bowel and abdominal cavity.<br>Metastasis found adjacent to abdominal smooth muscles and ribs. |
| <b>MNK1-KO</b> | B3227            | 56                              | Unknown                             | Found dead on day 56. Necropsy was not performed.                                                                                                 |
|                | B3227            | 140                             | Sacrificed at end of the experiment | No metastasis was found.                                                                                                                          |
|                | B3229            | 140                             |                                     |                                                                                                                                                   |
|                | B3230            | 140                             |                                     |                                                                                                                                                   |
|                | B3237            | 140                             |                                     |                                                                                                                                                   |
